# Supplementary figures and images for: Memory deficits and hippocampal cytokine expression in a rat model of ADHD
Source: PubMed Central journal article supplement — Brain Behav Immun Health. 2023 Nov 18;35:100700. doi: 10.1016/j.bbih.2023.100700 (PMC10724493; doi:10.1016/j.bbih.2023.100700), 2023-11-18

Figure 1S

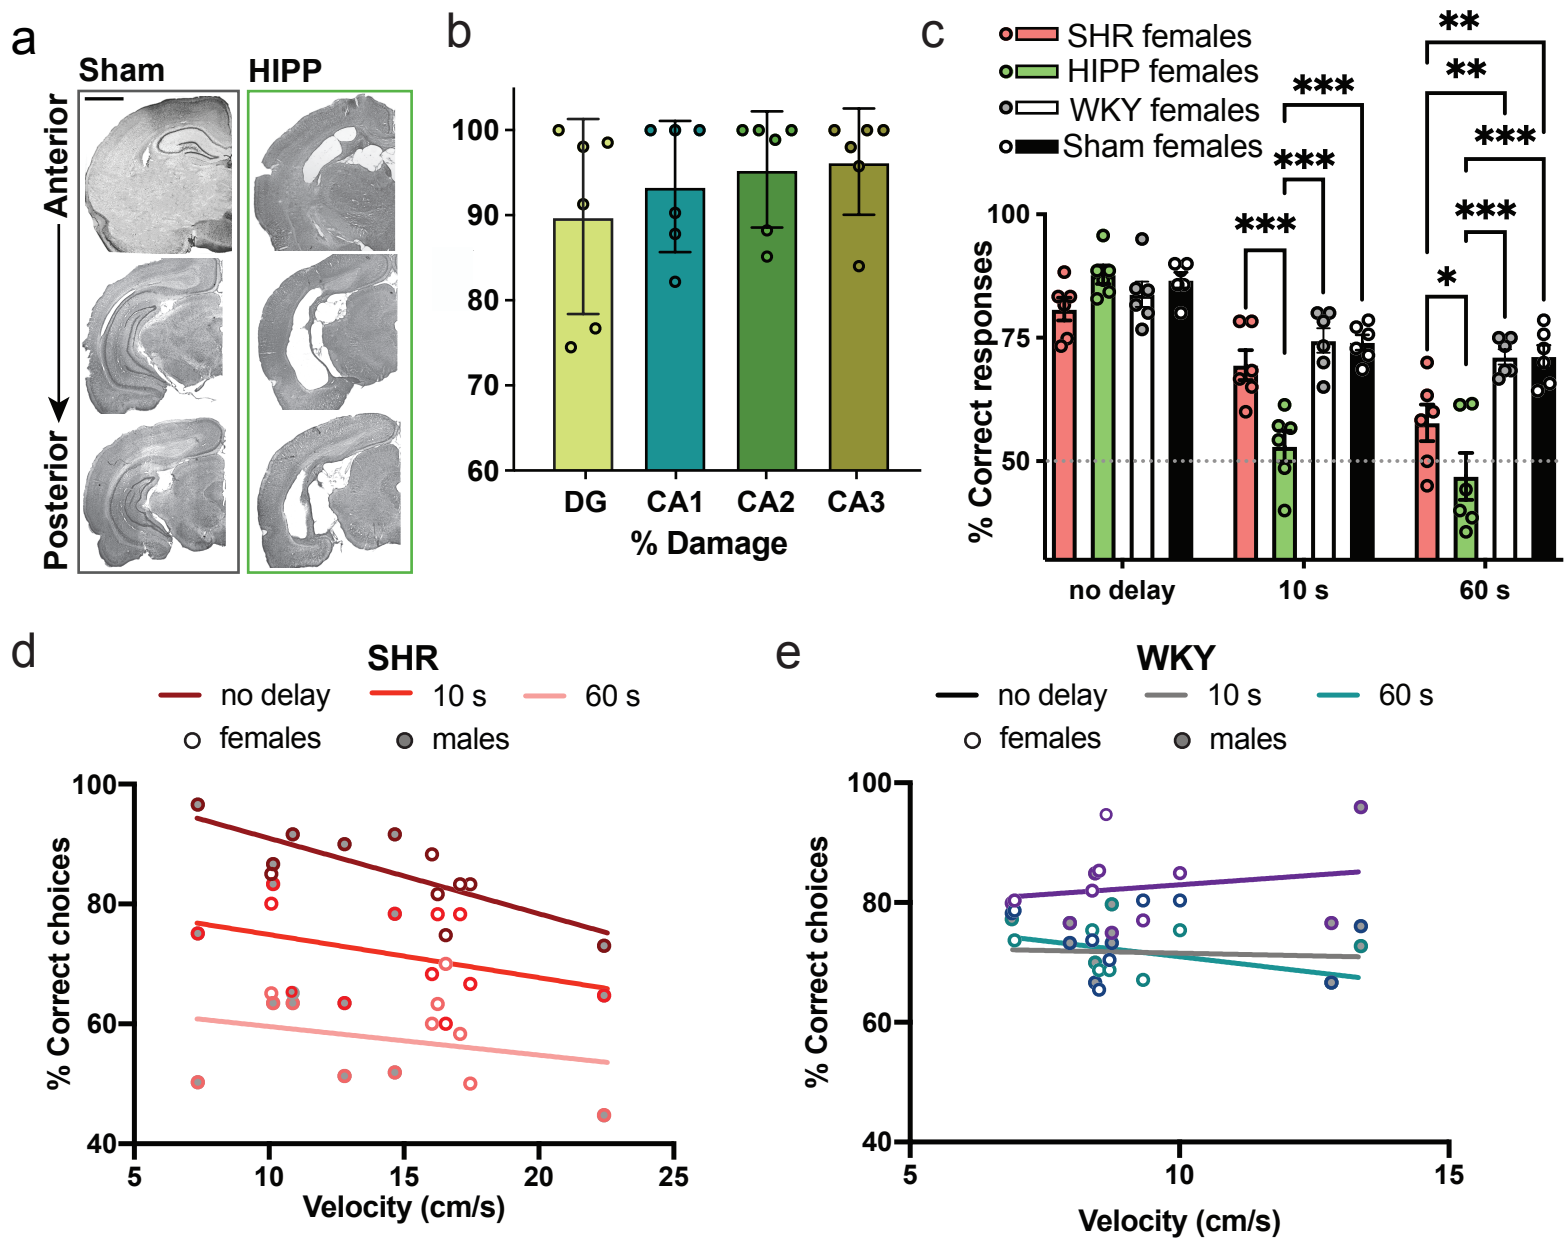

Supplement: mmc1.pdf [file mmc1.pdf]

Figure 2S

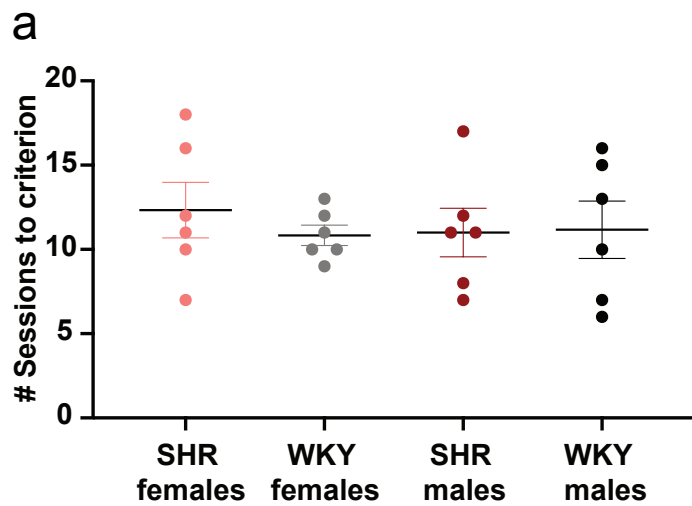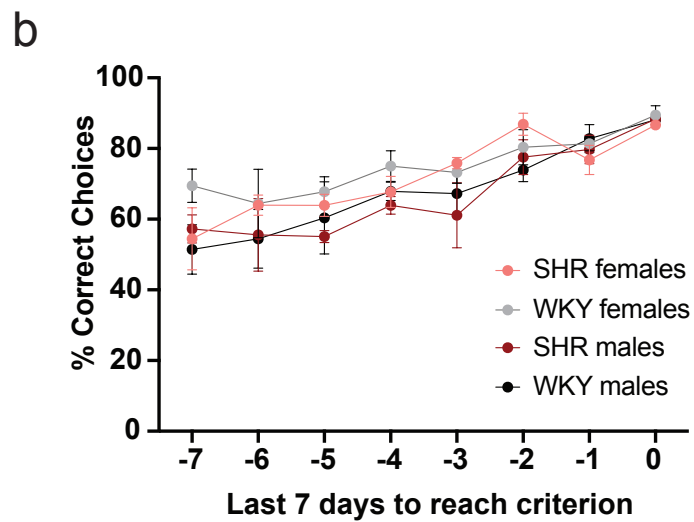

Supplement: mmc2.pdf [file mmc2.pdf]

Figure 3S

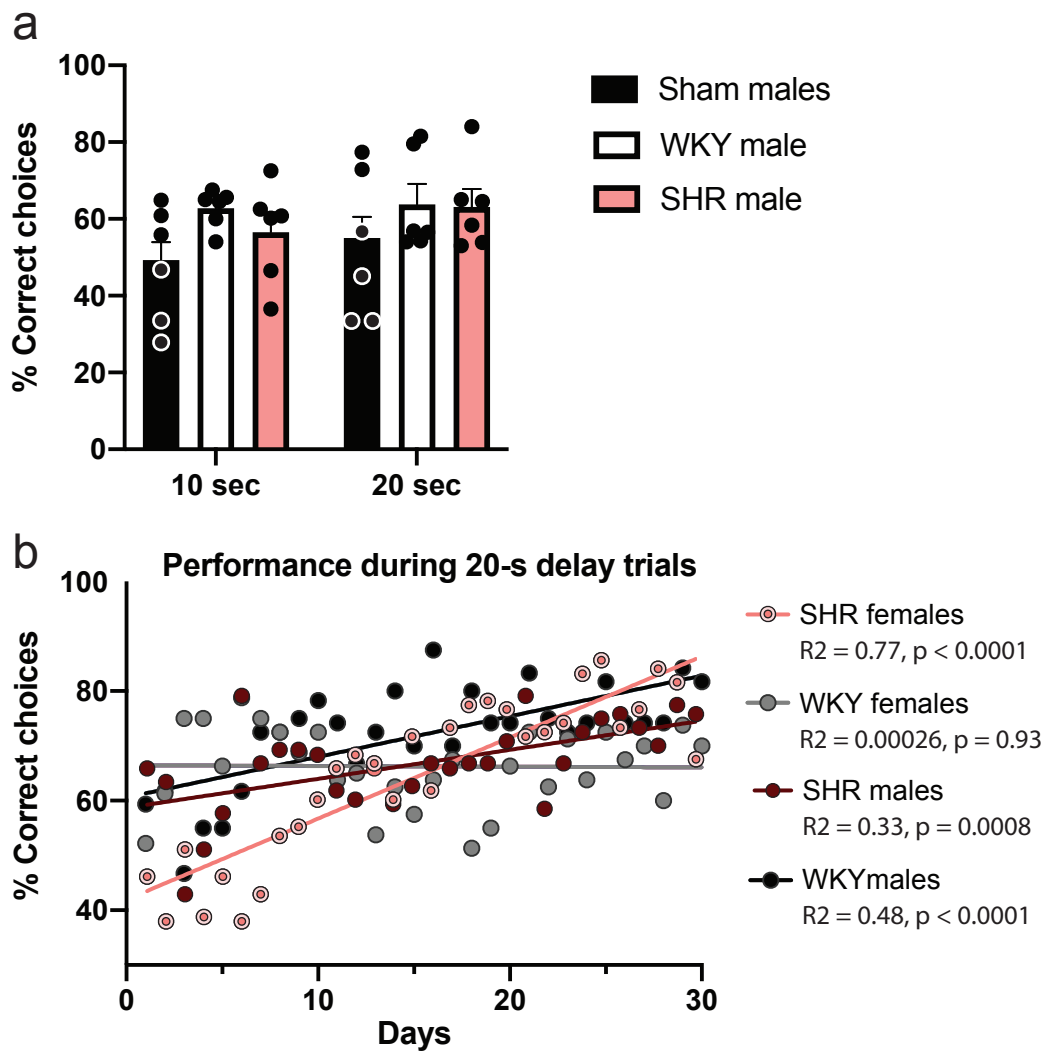

Supplement: mmc3.pdf [file mmc3.pdf]

Figure 4S

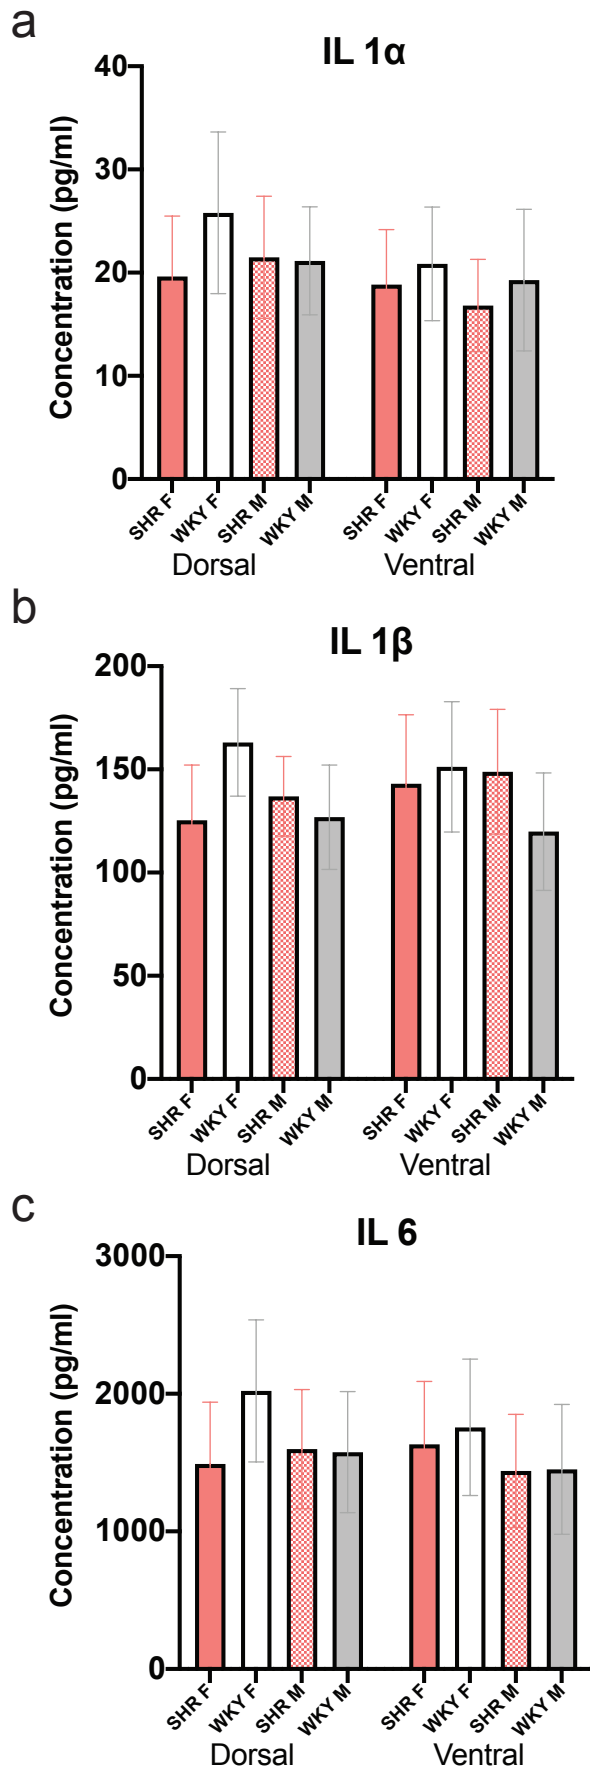

Supplement: mmc4.pdf [file mmc4.pdf]
